# Supplementary material for: Closed for business: The mortality impact of business closures during the Covid-19 pandemic
Source: PubMed Central journal article supplement (PMC8121299; doi:10.1371/journal.pone.0251373), 2021-05-14
Supplement: pone.0251373.s001.pdf [file pone.0251373.s001.pdf]

S1 Table: Variable Definition

| Variable                        | Definition                                                                                                                                                       |
|---------------------------------|------------------------------------------------------------------------------------------------------------------------------------------------------------------|
| $ExcDeathRate_{m,t}$            | Number of deaths in day $t$ of 2020, minus 7-day average around $t$ of 2015-2019, divided by municipality's residents;                                           |
| $\Delta ExcDeathRate_{m,t,t-1}$ | Daily change in $ExcDeathRate_{m,t}$                                                                                                                             |
| $gExcDeathRate_{m,t,t-1}$       | Daily growth rate in $ExcDeathRate_{m,t}$ ;                                                                                                                      |
| $\log(cExcDeathR_{m,t} + 1)$    | Cumulative $ExcDeathRate_{m,t} + 1$ , natural log;                                                                                                               |
| $d11_t$                         | Dummy variable, taking a value of one as of ten days after first policy (03/21); zero otherwise;                                                                 |
| $d25_t$                         | Dummy variable, taking a value of one from ten days after second policy (04/05); zero otherwise;                                                                 |
| $Shutdown11_m$                  | Number of employees and business owners of sectors shutdown on March 11 <sup>th</sup> divided by the total employees and business owners in a municipality $m$ ; |
| $Shutdown25_m$                  | Number of employees and business owners of sectors shutdown on March 25 <sup>th</sup> divided by the total workforce in a municipality $m$ ;                     |
| $Food11_m$                      | Workforce in the food sector divided by the total labor force in a municipality $m$ ;                                                                            |
| $Retail11_m$                    | Workforce in the retail sector divided by the total labor force in a municipality $m$ ;                                                                          |
| $Personal11_m$                  | Workforce in the personal-services sector divided by the total labor force in a municipality $m$ ;                                                               |
| $\log(Pop_m)$                   | Municipality $m$ residents, natural logarithm;                                                                                                                   |
| $PopDens_m$                     | Residing population in municipality $m$ per territory (squared km), natural logarithm;                                                                           |
| $IntMob_m$                      | Internal work/study inflows in the municipality $m$ , ratio of inflows and outflows from $m$ ;                                                                   |
| $HighSchool_p$                  | High school graduates, fraction of working age population;                                                                                                       |
| $IncIneq_m$                     | 20-20 income fraction of working age population in a municipality $m$ ;                                                                                          |
| $Elderly_p$                     | Number of 65+ old people, fraction of population;                                                                                                                |
| $Hospitaliz_p$                  | Number of beds available in all hospitals per residents in a province $p$ , percentage points;                                                                   |
| $RelShutdown11_n$               | $Shutdown11_m$ of the largest exposed municipality $m$ relative to the total workforce in $m$ , with at least 16,500 inhabitants, in the province;               |
| $AbsShutdown11_n$               | $Shutdown11_m$ of the largest exposed municipality $m$ in absolute terms (number of affected workforce), with at least 16,500 inhabitants, in the province;      |
| $PopShutdown11_n$               | $Shutdown11_m$ of the largest exposed municipality $m$ in terms of number of residents, with at least 16,500 inhabitants, in the province;                       |
| $WinterTourists_p$              | Number of tourists in all types of accommodations in a province $p$ , over January-February 2007 (ISTAT);                                                        |
| $WeekArrival_m$                 | Time from the virus arrival date in a municipality $m$ to March 21th, measured in number of weeks;                                                               |
| $DaysArrival_{m,t}$             | Number of days elapsed from the virus arrival date in a municipality $m$ ;                                                                                       |

This table shows the definition of each variable used in the empirical analysis of the paper *Closed for Business: the mortality impact of business closures during the Covid-19 pandemic* (Bongaerts, Mazzola and Wagner, 2021).
